# Supplementary material for: Highly efficient near-UV-excitable Ca2YHf2Al3O12:Ce3+,Tb3+green-emitting garnet phosphors with potential application in high color rendering warm-white LEDs
Source: Royal Society of Chemistry journal article supplement (doi:10.1039/d0tc00130a), 2020-01-01
Supplement: d0tc00130a1.pdf [file d0tc00130a1.pdf]

# Supporting Information

## **Highly efficient near-UV-excitable $\text{Ca}_2\text{YHf}_2\text{Al}_3\text{O}_{12}:\text{Ce}^{3+},\text{Tb}^{3+}$ green-emitting garnet phosphors with potential application in high color rendering warm-white LEDs**

Shaoying Wang<sup>a</sup>, Balaji Devakumar<sup>b</sup>, Qi Sun<sup>a</sup>, Jia Liang<sup>a</sup>, Liangling Sun<sup>b</sup>, and  
Xiaoyong Huang<sup>a,\*</sup>

<sup>a</sup> College of Physics and Optoelectronics, Taiyuan University of Technology, Taiyuan  
030024, P. R. China.

<sup>b</sup> Department of Physics, Mohamed Sathak A.J. College of Engineering, Chennai  
603103, Tamilnadu, India.

\*Corresponding author, E-mail address: [huangxy04@126.com](mailto:huangxy04@126.com)

**Table S1.** CIE color coordinates of CYHA:0.03Ce<sup>3+</sup>,0.6Tb<sup>3+</sup> phosphors as a function of temperature (303-423 K).

| Temperature (K) | CIE (x, y)     |
|-----------------|----------------|
| 303             | (0.330, 0.520) |
| 323             | (0.327, 0.516) |
| 343             | (0.323, 0.512) |
| 363             | (0.319, 0.505) |
| 383             | (0.311, 0.499) |
| 403             | (0.305, 0.490) |
| 423             | (0.298, 0.480) |

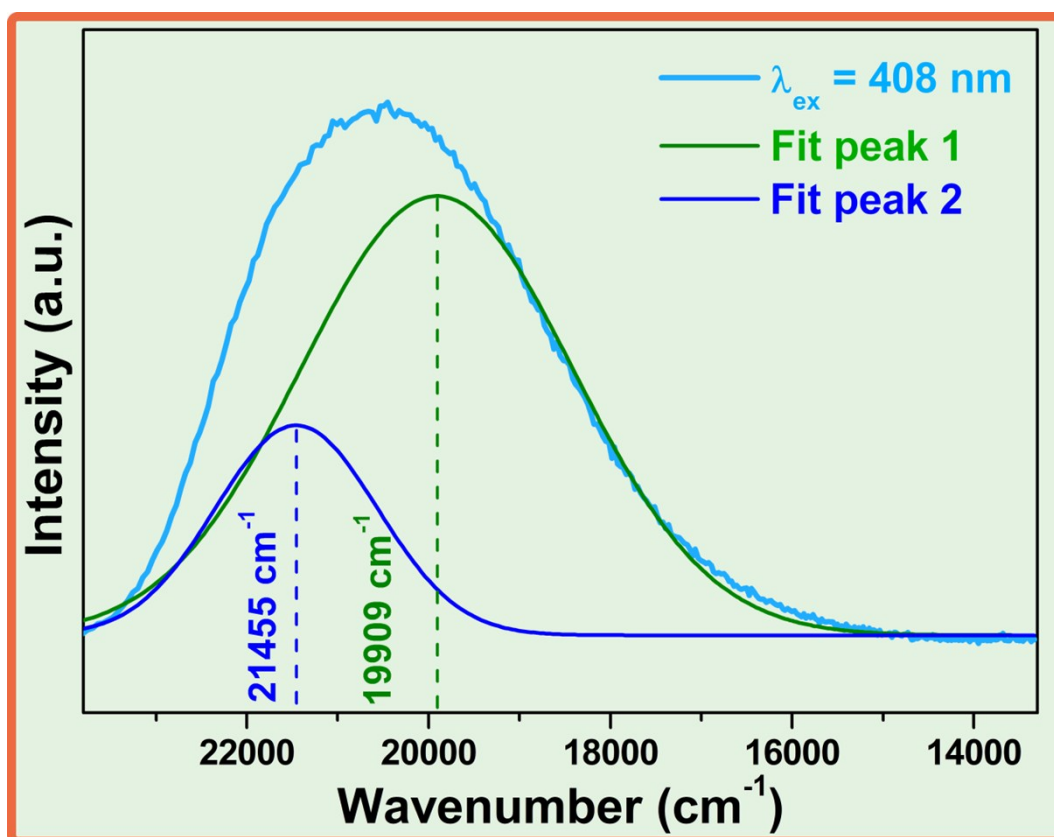

**Figure S1.** Gaussian fitting of PL spectrum of CYHA:0.03Ce<sup>3+</sup> phosphors in the energy scale under 408 nm excitation.
